# Supplementary material for: Multicenter Analysis of Clinical Features and Prognosis of COVID-19 Patients with Hepatic Impairment
Source: PubMed Central journal article supplement — Gut Liver. 2021 Apr 2;15(4):606–15. doi: 10.5009/gnl20267 (PMC8283294; doi:10.5009/gnl20267), 2021-04-02
Supplement: gnl-15-4-606-supple.pdf [file gnl-15-4-606-supple.pdf]

**Supplementary Table 1.** Subclassification of Patients According to Change of Aminotransferase during Hospitalization

| Group                                                  | Normal aminotransferase group<br>(n=512) | Abnormal aminotransferase group<br>(n=362) | Total<br>(n=874) |
|--------------------------------------------------------|------------------------------------------|--------------------------------------------|------------------|
| Group 1. Continuous normal level of aminotransferase   | 341                                      | 0                                          | 341              |
| Group 2. Normal to elevated level of aminotransferase  | 79                                       | 130                                        | 209              |
| Group 3. Continuous elevated level of aminotransferase | 0                                        | 143                                        | 143              |
| Group 4. Elevated level of aminotransferase to normal  | 92                                       | 89                                         | 181              |

To find out coronavirus disease 2019 patients who experienced elevated aminotransferase at least once during hospitalization, "normal aminotransferase group" and "abnormal aminotransferase group" were subclassified according to following category; group 1. continuous normal level of aminotransferase, group 2. normal to elevated level of aminotransferase, group 3. continuous elevated level of aminotransferase, group 4. elevated level of aminotransferase to normal. We defined abnormal aminotransferase group as sustained elevation of aspartate aminotransferase or alanine aminotransferase aspartate aminotransferase or alanine aminotransferase levels higher than the upper limit of normal values in two consecutive laboratory tests conducted every 3 to 7 days within 2 weeks of hospitalization. Thus, patients with once or rarely twice nonconsecutive elevation of aminotransferase were assigned to "normal aminotransferase group". In case of group 1, all patients had normal aminotransferase level at admission and during hospitalization, thus all were assigned to "normal aminotransferase group". All patients of group 3 had sustained elevated aminotransferase at admission and during hospitalization, thus all were assigned to "abnormal aminotransferase group". Group 2 was defined as patients who had normal aminotransferase at admission and once or more elevated aminotransferase during hospitalization. Among 79 patients of normal aminotransferase group, 76 patients had elevated aminotransferase during hospitalization only once, the remaining 3 patients showed twice nonconsecutive elevation of aminotransferase. 130 patients of abnormal aminotransferase group showed elevated aminotransferase in two consecutive laboratory tests during hospitalization. Group 4 was defined as patients who had elevated aminotransferase at admission and normal aminotransferase during hospitalization at least once. Among 92 patients of normal aminotransferase group, 86 patients had elevated aminotransferase at admission and after that time sustained normal aminotransferase during hospitalization. The remaining 6 patients had elevated aminotransferase at admission and then normalization in next consecutive tests, and elevated aminotransferase in last laboratory test. Among 89 patients of abnormal aminotransferase group, 45 patients had sustained elevated aminotransferase at admission and next consecutive tests, and normalization in last laboratory test. The remaining 44 patients showed elevated aminotransferase at admission and then normalization in next one test, followed by sustained elevated aminotransferase in next consecutive tests.

**Supplementary Table 2.** Clinical Characteristics of Patients with COVID-19 According to Elevated Aminotransferase Levels

| Characteristics                                      | Liver tests (aminotransferase) |                     | Total               | p-value |
|------------------------------------------------------|--------------------------------|---------------------|---------------------|---------|
|                                                      | ≤2 ULN                         | >2 ULN              |                     |         |
| No. of patients                                      | 716 (81.9)                     | 158 (18.1)          | 874                 |         |
| Age, yr                                              | 62 (51–73)                     | 61 (51–75)          | 62 (51–73)          | 0.470   |
| Male sex                                             | 234 (32.7)                     | 74 (46.8)           | 308 (35.2)          | 0.001   |
| Body mass index, kg/m <sup>2</sup>                   | 23.6 (21.5–25.4)               | 25.3 (22.6–27.4)    | 23.7 (21.7–26.0)    | 0.001   |
| Comorbidity                                          |                                |                     |                     |         |
| Diabetes                                             | 146 (20.4)                     | 34 (21.5)           | 180 (20.6)          | 0.751   |
| Hypertension                                         | 240 (33.5)                     | 43 (27.2)           | 283 (32.4)          | 0.125   |
| Coronary artery disease                              | 25 (3.5)                       | 9 (5.7)             | 34 (3.9)            | 0.195   |
| Chronic obstructive pulmonary disease                | 8 (1.1)                        | 5 (3.2)             | 13 (1.5)            | 0.054   |
| Chronic kidney disease                               | 14 (2.0)                       | 2 (1.3)             | 16 (1.8)            | 0.558   |
| Chronic liver disease                                | 25 (3.5)                       | 5 (3.2)             | 30 (3.4)            | 0.838   |
| Liver cirrhosis                                      | 10 (1.4)                       | 4 (2.5)             | 14 (1.6)            | 0.304   |
| Signs and symptoms on admission                      |                                |                     |                     |         |
| Fever/chills                                         | 300 (42.4)                     | 90 (57.0)           | 390 (45.0)          | 0.001   |
| Cough                                                | 406 (57.4)                     | 95 (60.5)           | 501 (58.0)          | 0.479   |
| Dyspnea                                              | 162 (22.9)                     | 61 (38.6)           | 223 (25.8)          | <0.001  |
| Gastrointestinal symptoms (nausea/vomiting/diarrhea) | 164 (23.2)                     | 40 (25.3)           | 204 (23.6)          | 0.564   |
| Myalgia                                              | 230 (32.5)                     | 58 (36.9)           | 288 (33.3)          | 0.284   |
| Headache                                             | 184 (26.0)                     | 40 (25.5)           | 224 (25.9)          | 0.895   |
| Days from symptom onset to admission                 | 6 (3–9)                        | 6 (3–9)             | 6 (3–9)             | 0.694   |
| SIRS on admission                                    | 74 (10.4)                      | 41 (25.9)           | 115 (13.2)          | <0.001  |
| Severe patients on admission                         | 82 (11.5)                      | 48 (23.5)           | 130 (14.9)          | <0.001  |
| Radiologic findings on admission                     |                                |                     |                     |         |
| Abnormal chest radiographs                           | 417 (58.2)                     | 114 (72.2)          | 531 (60.8)          | 0.001   |
| Bilateral involvement of chest radiographs           | 285 (39.8)                     | 83 (52.5)           | 368 (42.1)          | 0.003   |
| On admission                                         |                                |                     |                     |         |
| Complete blood count                                 |                                |                     |                     |         |
| White blood cell count, /μL                          | 5,235 (4,050–6,698)            | 5,495 (4,228–7,553) | 5,300 (4,077–6,735) | 0.006   |
| Lymphocyte count, /μL                                | 1,379 (1,001–1,822)            | 1,221 (777–1,791)   | 1,350 (960–1,810)   | 0.597   |
| Platelet count, ×10 <sup>3</sup> /μL                 | 223 (174–284)                  | 189 (148–251)       | 216 (166–279)       | <0.001  |
| Hemoglobin, g/dL                                     | 12.5 (11.7–13.5)               | 12.8 (11.8–14.0)    | 12.5 (11.7–13.6)    | 0.807   |
| Inflammatory markers                                 |                                |                     |                     |         |
| Erythrocyte sedimentation rate, mm/hr                | 53 (31–71)                     | 43 (30–67)          | 50 (31–70)          | 0.527   |
| C-reactive protein, mg/L                             | 1.2 (0.2–6.2)                  | 3.9 (0.5–12.5)      | 1.5 (0.2–7.2)       | 0.448   |
| Biochemical tests                                    |                                |                     |                     |         |
| Blood urea nitrogen, mg/dL                           | 14 (11–17)                     | 14 (11–19)          | 14 (11–18)          | 0.242   |
| Creatinine, mg/dL                                    | 0.7 (0.6–0.9)                  | 0.8 (0.6–1.0)       | 0.7 (0.6–0.9)       | 0.614   |
| eGFR, mL/min/1.73 m <sup>2</sup>                     | 92 (76–108)                    | 89 (72–109)         | 91 (75–108)         | 0.285   |
| Sodium, mmol/L                                       | 140 (138–142)                  | 140 (136–142)       | 140 (137–142)       | 0.174   |
| Potassium, mmol/L                                    | 4.2 (3.8–4.4)                  | 4.0 (3.7–4.4)       | 4.1 (3.8–4.4)       | 0.749   |

Data are presented as the number (%) or median (interquartile range).

COVID-19, coronavirus disease 2019; ULN, upper limit of normal; SIRS, systemic inflammatory response syndrome; eGFR, estimated glomerular filtration rate.

**Supplementary Table 3.** Subgroup Analysis for 550 Patients with Normal Aminotransferase on Admission

| Variable                                             | Liver tests (aminotransferase) |                  | Total            | p-value |
|------------------------------------------------------|--------------------------------|------------------|------------------|---------|
|                                                      | Normal                         | Abnormal         |                  |         |
| No. of patients                                      | 420 (76.4)                     | 130 (23.6)       | 550              |         |
| Age, yr                                              | 60 (47–73)                     | 59 (50–69)       | 60 (48–72)       | 0.628   |
| Male sex                                             | 106 (25.2)                     | 50 (38.5)        | 156 (28.4)       | 0.003   |
| Body mass index, kg/m <sup>2</sup>                   | 22.8 (20.7–24.9)               | 24.0 (22.2–25.8) | 23.4 (21.3–25.0) | 0.014   |
| Comorbidity                                          |                                |                  |                  |         |
| Diabetes                                             | 81 (19.3)                      | 23 (17.7)        | 104 (18.9)       | 0.685   |
| Hypertension                                         | 132 (31.4)                     | 29 (22.3)        | 161 (29.3)       | 0.046   |
| Coronary artery disease                              | 8 (1.9)                        | 9 (6.9)          | 17 (3.1)         | 0.004   |
| COPD                                                 | 5 (1.2)                        | 3 (2.3)          | 8 (1.5)          | 0.352   |
| CKD                                                  | 10 (2.4)                       | 1 (0.8)          | 11 (2.0)         | 0.251   |
| Chronic liver disease                                | 18 (4.3)                       | 5 (3.8)          | 23 (4.2)         | 0.827   |
| Liver cirrhosis                                      | 4 (1.0)                        | 1 (0.8)          | 5 (0.9)          | 0.848   |
| Signs and symptoms on admission                      |                                |                  |                  |         |
| Fever/chills                                         | 159 (38.4)                     | 55 (42.3)        | 214 (39.3)       | 0.427   |
| Cough                                                | 229 (55.4)                     | 85 (65.4)        | 314 (57.8)       | 0.045   |
| Dyspnea                                              | 63 (15.2)                      | 25 (19.2)        | 88 (16.2)        | 0.278   |
| Gastrointestinal symptoms (nausea/vomiting/diarrhea) | 85 (20.5)                      | 37 (28.5)        | 122 (22.4)       | 0.059   |
| Myalgia                                              | 124 (30.0)                     | 49 (37.7)        | 173 (31.8)       | 0.098   |
| Headache                                             | 112 (27.1)                     | 41 (31.5)        | 153 (28.1)       | 0.321   |
| Days from symptom onset to admission                 | 6 (4–9)                        | 6 (3–8)          | 6 (3–9)          | 0.082   |
| SIRS on admission                                    | 24 (5.7)                       | 14 (10.8)        | 38 (6.9)         | 0.047   |
| Severe patients on admission                         | 22 (5.2)                       | 11 (8.5)         | 33 (5.7)         | 0.176   |
| Radiologic findings on admission                     |                                |                  |                  |         |
| Abnormal chest radiographs                           | 202 (48.1)                     | 78 (60.0)        | 280 (50.9)       | 0.018   |
| Bilateral involvement of chest radiographs           | 114 (27.1)                     | 51 (39.2)        | 165 (30.0)       | 0.009   |
| Treatment                                            |                                |                  |                  |         |
| Lopinavir/ritonavir                                  | 193 (46.0)                     | 81 (62.3)        | 274 (49.8)       | 0.001   |
| Darunavir/cobicistat                                 | 9 (2.1)                        | 1 (0.8)          | 10 (1.8)         | 0.306   |
| Hydroxychloroquine                                   | 198 (47.1)                     | 70 (53.8)        | 268 (48.7)       | 0.181   |
| Antibiotics                                          | 273 (65.0)                     | 107 (82.3)       | 380 (69.1)       | <0.001  |

Data are presented as the number (%) or median (interquartile range).

COPD, chronic obstructive pulmonary disease; CKD, chronic kidney disease; SIRS, systemic inflammatory response syndrome.
